# Supplementary material for: Evaluating the quality of evidence for gaming disorder: A summary of systematic reviews of associations between gaming disorder and depression or anxiety
Source: PLoS One. 2020 Oct 26;15(10):e0240032. doi: 10.1371/journal.pone.0240032 (PMC7588081; doi:10.1371/journal.pone.0240032)
Supplement: S1 Data Extraction — (XLSX) [file pone.0240032.s004.xlsx]

## Sheet: Extraction sheet
Review quality criteria	Sugaya et al. 2019	González-Bueso et al., 2018	Mihara & Higuchi, 2017	Männikkö et al., 2017	King et al., 2013	Kuss & Griffiths, 2012. Internet Gaming Addiction…	Kuss & Griffiths, 2012. Online gaming addiction…
What is the objective of the systematic review? (Cut and paste from article in this order of priority: Abstract, Methods, Background, Other. If not reported, enter NR.)	(Abs) "we performed an updated review of studies of IGD in children and adolescents to assess the clinical implications of IGD..."(Methods)"The purpose of our review is to summarize the multi-dimensional characteristics of children and adolescents with IGD..."(Backgrnd)"we reviewed previous studies of IGD in children and adolescents to gain a better understanding of biopsychosocial factors of IGD…	" The aim of this study is to review systematically the current literature in order to explore the association between Internet Gaming Disorder (IGD) and psychopathology."	"This review attempts to systematically identify both cross-sectional and longitudinal epidemiological studies of IGD, and to briefly summarize the methodology of the included studies. The estimated prevalence of and factors associated with IGD were then ascertained from cross-sectional studies. With regard to longitudinal studies, analyses were focused on risk and protective factors, health and …	"...aimed to investigate the interplay between problematic gaming behaviour and health-related outcomes at different developmental stages."	"The primary aim of this systematic review was to summarize and critique available research evidence on clinical assessment of pathological video-gaming"	"this literature review attempts to reduce this confusion by providing an inNovative framework by which all the studies to date can be categorized."	"in order (i) to present the classification basis of online gaming addiction using official mental disorder frameworks, (ii) to identify empirical studies that assess online gaming addiction in children and adolescents, and (iii) to present and evaluate the findings against the background of related and established mental disorder criteria."
What is the main conclusion of the systematic review?(Cut and paste from article in this order of priority: Abstract, Discussion, Other. If not reported, enter NR.)	"Across studies, the presence of IGD had a negative effect on sleep and schoolwork in miNors. Additionally, family factors, including the quality of parent-child relationships, were important social factors in miNors with IGD. Brain imaging studies indicate that impaired cognitive control in miNors with IGD is associated with abNormal function in the prefrontal cortex and striatum. Persistent pat…	"Compared with IA (which showed strong correlations only with depression), IGD showed strong correlations with anxiety, depression, ADHD or hyperactivity symptoms, social phobia/anxiety, and obsessive-compulsive symptoms. The lack of longitudinal studies and the contradictory results obtained makes it difficult to detect the directionality of these associations and shows the existing complexity o…	Discussion: "IGD causes serious health and social problems, but the development of treatment is in the early stages."	"the results suggested that problematic gaming behaviour is significantly associated with a wide range of detrimental health-related outcomes"	"It is concluded that a unified approach to assessment of pathological video-gaming is needed."	"it is argued that Internet gaming addiction follows a continuum, with antecedents in etiology and risk factors, through to the development of a “full-blown” addiction, followed by ramifications in terms of negative consequences and potential treatment."	"Evidence suggests that problematic online gaming can be conceptualized as a behavioral addiction rather than a disorder of impulse control."
In your judgment, did the authors ask at least one clearly-focused research question? (Answer Yes if at least the population [e.g., adults] and at least one outcome are specified in the review)	Yes	Yes	No: They used a broad criteria of finding all studies on IGD, not for a specific popluation.	Yes	Yes, but question doesn't fit (edited)	No	Yes
Did the authors report having eligibility criteria for including/excluding primary studies?	Yes	Yes	Yes	Yes	Yes	Yes	Yes
Did the authors say the eligibility criteria were pre-specified? (Answer YES if a protocol or design paper with eligibility criteria is cited.)	No	Yes	No	No	No	No	No
Did they specify that they limited the review to studies that used scales associated with gaming specifically (as opposed to Internet addiction in general)? Answer YES if the study eligibility criteria included language such as "assessed problematic gaming behavior" AND simultaneously excluded studies that "had a focus on other techNology addictions (e.g., IA)")	No	No: "studies were also included if the object of research was IA, only if it was specified that the Internet was used to play video games, and/or the results were separated according to Internet use and whether video games were one of those activities.""	No	No; they incl studies that used YIAT	No	No	No
Did the authors specify how they would decide which outcomes to include from studies, if one of the included studies reported multiple outcomes?	No	Unclear. They considered only full association, partial association vs. not and based this on finding a "correlaion…for both genders after multivariate analysis" (p. 3). Yet papers could still have multiple multivariate analyses.	No	No	No	No	No
Did the authors say their review was limited to any specific ages?	Yes, <20 (but figure says <28 included in PsycInfo search)	No	No	They excluded if mean age <12.5, although their youngest age group is described as "children and adolescents"	No	No	Yes, children and adolescents had to be included in the sample
Did the authors report that they planned to include participants with any of the following CONDITIONS? IGD/PG, At-risk for IGD/PG, Internet addiction/PIU, engaged gamers, extensive/excessive gamers, people with psychiatric disorders or other disorders	Yes	IGD or IA IF the studies specified that Internet was usedto play VG, or results were separated by VG use and Internet use	‘problematic or pathological gaming condition comparable to IGD in DSM-5, including both online and offline platforms.’ Therefore, ‘IGD’ in this review is not identical to ‘IGD,’ as defined by DSM-5,	IGD	IGD/PG	Yes-IGA	IGD/PG
Which depression measures --including any symptoms like hopelessness or suicidal thoughts--were listed in the Methods or Results sections, if any?	"depression"	Many, e.g. FDD for DSM-IV, BDI, DSRS-A, PHQ-9, DSSS	None listed but depression, depressive symptoms, suicidal and self-injurious behaviors,	BDI and HADS but many more in supplement	None listed	CES Depr scale, BDI, "suicidal thoughts", "symptoms of generalized anxiety disorder, panic disorder, depression, social phobia"	Some listed in table, EG Depressive Mood List, but mostly Nonspecific "depression"
Which anxiety measures --including symptoms or disorders like phobias or OCD--were listed in the Methods or Results sections, if any?	"anxiety"	Many, e.g. SCAS, GAD-7, SPIN, SCARED, BAI	None listed but "school-related anxieties, separation anxiety, panic, social phobia	HADS, but more in Suppl	None listed	No measures but text: "symptoms of generalized anxiety disorder, panic disorder, depression, social phobia … school phobia"	Some listed in table, e.g. Revised Soc Anx scale for children, but mostly "anxiety" or phobia-related
Did they authors specify the types of samples included in the study? E.g., representative samples, web-based or online samples, convenience samples, etc. Include language about which sample used	No	No	"characteristics of samples and methods for data collection were clearly described and were deemed methodologically sound; (iii) number of samples was 300 or higher"	Unclear	Yes: "Studies were selected on the basis of employing a psychometric in- strument to assess pathological video-gaming. The purpose of this study was to conduct an exhaustive review of the standards in assess- ment of all published quantitative research on pathological gaming. Therefore, studies were not necessarily excluded on the basis of method- ological shortcomings, such as low sample size"	No	Unclear
How did the authors report which outcomes they planned to use?, if they reported any specific approach to reporting which outcomes they planned to use (e.g., outcomes from "validated" measures, "relevant outcomes", etc.)	No	Unclear. They considered only full association, partial association vs. not and based this on finding a "correlaion…for both genders after multivariate analysis" (p. 3)	No, "associated factors"	No--"key information"	No, but used a framework to identify "relevant characteristics" of studies to use in an evaluation framework	No	No
If authors reported another way of choosing outcomes, please cut and paste that wording here.	n/a	See above	n/a	n/a	"Although pathological video-gaming represents a relatively new field of clinical psychology, research evidence has linked the disorder to aggressive behavior (Anderson et al., 2010), attention problems (Swing, Gentile, Anderson, &Walsh, 2010), Axis I disorders (Mentzoni et al., 2011), poor academic achievement (Smyth, 2007), reduced empathy (Bartholomew, Sestir, & Davis, 2005), and impaired soci…	n/a	No
Which databases did the authors report searching?	PubMed, MEDLINE, and PsycINFO and hand searched reference lists of selected articles	PubMed, PsycInfo, Science Direct, Web of Science, Google Scholar (first 30 pp)	PubMed and PsychINFO	Scopus, 174 in MEDLINE, 87 in CINAHL, 49 in PsycArticles	Academic Search Premier, PubMed, PsychINFO, ScienceDirect, and Web of Science	Web of Knowledge, Google Scholar	Web of Knowledge& Also used Google Scholar
How did the authors describe controlling for confounding, if they did?	N/a	They did not but they assessed publication bias	No	They looked for publication bias but not confounding	n/a	n/a	No
Did the authors report using any of the following methods to identify relevant studies from grey literature or other sources? [Searched for Non-English language studies in at least one of the above databases, searched for all relevant years for at least one database, Searched reference lists or searched for reports that cited included studies, contacted experts in the field or study authors, sear…	Searched reference lists of selected rticles	Searching the citations in the selected literature and looking for articles in Spanish	Recent review articles (n=2) were also referenced	It seems they excluded them: "were unpub- lished dissertations, thesis studies and/or con- ference papers; (6) were not published in a peer-reviewed journal;" but also 3 from other sources"?	Searched lists of references in included studies and systematic reviews	"further studies were identified from supplementary sources, such as Google Scholar..."	Google Scholar, included German
Overall, in your judgment, do you think the search for evidence was reasonably comprehensive?	Yes	Yes	No-Did not search grey literature or references of included articles	Yes	Yes	No-Did not search grey literature or references of included articles	Yes
Did the authors report how many reviewers were involved in assessing each title and/or abstract's eligibility? If so, how many were involved?	No	Yes " 2, 3rd reviewer if necessary. ""The studies were systematically and independently reviewed by the authors (Vega González-Bueso and Juan José Santamaría); paying attention to the study type, study population, methodology, outcome measures, effect sizes and interpretation of results. In cases of discrepancies, these were resolved through consensus or referral to a third reviewer (Laura MeriNo…	No	Yes, 2	No	No	No
Did the authors report that reviewers worked independent in assessing each title and/or abstract's eligibility?	No	Yes	No	Yes	No	No	No
Did the authors report how many reviewers were involved in assessing each full text article's eligibility? If so, how many?	No	They did not distinguish between title/abstract reviewing and full-text reviewing	No	Yes, 2	No	No	No
Did the authors report that reviewers worked independent in assessing each full text article's eligibility?	No	They did not distinguish between title/abstract reviewing and full-text reviewing	No	Yes	No	No	No
Did the authors report how many reviewers were involved in assessing the risk of bias for each included study? If so, how many?	No	They did not distinguish between title/abstract reviewing and full-text reviewing	No	No	No	No	No
Did the authors report that reviewers worked independently in assessing the risk of bias for each included study?	No	They did not distinguish between title/abstract reviewing and full-text reviewing	No	n/a	No	No	No
Did the authors report how many reviewers were involved in abstracting data from each included study? If so, how many?	No	No	No	No	Yes	No	No
Did the authors report that reviewers worked independently in abstracting data from each included study?	No	No	No	n/a	Yes	No	No
Did the authors report that they planned to assess the risk of bias in individual studies? Was there evidence of a systematic review of bias in the Results or Discussion section?	No	They assessed only publication bias	No	Yes	No	No	No
How many primary studies were included in the systematic review? (enter "can't tell" if the reporting was unclear)	can't tell - says 51 but there aren't that many citations in text and tables and No overall summary of findings table	24	37 cross-sectional and 13 longitidunal	50	63 but 18 scales were assessed	58	30
Retrieve the full text for each study included in this review. Cut and paste below the text from each individual study that describes the scale or other measurement used to measure IGD/PG. All included studies for this review will be described in this response. Format the response as 1. Author(year), "text"/// 2. Author year, "text". Example: 1. Van Rooij 2011, "The 14-item version of the CIUS [3…	See list of studies & Pgscales	See list of studies & Pgscales	See list of studies & Pgscales	See list of studies & Pgscales	See list of studies & Pgscales	See list of studies & Pgscales	See list of studies & Pgscales
Of the included studies for this review, how many used a scale specific to IGD/PG to measure associations with depression? (For example, if 12 studies were included but only 6 of those were PG studies, and of the 6 PG studies only 3 assessed associations between PG and depression, you would answer 3.)	1 of 2	Out of the 17 that measured PG/IGD, (about the other 7, the authors say they only included studies that talked about the sample being gamers or primarily gaming as the problem), 13 measure PG/IGD and depression	10 out of 12	7 out of 10	3 out of 8	None, but clinical interview with case report	3 out of 4
Of the included studies for this review, how many used a scale specific to IGD/PG to measure associations with anxiety? (For example, if 12 studies were included but only 6 of those were PG studies, and of the 6 PG studies only 3 assessed associations between PG and anxiety, you would answer 3.)	1 of 1	Out of the 17 that measured PG/IGD, 12 measured PG/anx	5 out of 6	13 out of 15	4 out of 4	2/3 PG scale, 1 interview	2 out of 4
If the systematic review combined studies with scales measuring PG and scales measuring IA, was this mentioned anywhere in the study?	"Regarding the studies that used other methods of classification, we quote the name of the disorder used in each study (e.g., problematic Internet game user, pathological computer game player)." Tables list various names of scales but all say something like "IGD group", even if scale was for Internet addiction	Yes, page 3: "Studies were also included if the object of research was IA, only if it was specified that the Internet was used to play video games, and/or the results were separated according to Internet use and whether video games were one of those activities."	No	No; it's just mentioned that there is significant variability in measurement	Yes	No	No
How many participants were included in the systematic review? (enter "can't tell" if the reporting was unclear)	can't tell, No SoF table and discrepancy between reported number of studies and studies in tables/text	53889	127749	129430	58415	Unclear, seems to have been only reported on a study level	72825
Did the authors describe the characteristics of the included studies in a table, in the text, both, or neither?	Some tables but No overall SoF table	Both	Table	Both	Both	text	both
Of the following, which elements of the included studies were described? Participants/sample, age, scales used to measure PG, scales for depression/anxiety, risk of bias, control variables used in analyses (e.g., demographics, time playing video games), time period (if longitudinal studies were included)	Prevalence table shows N, Prevalence, DiagNostic criteria (DSM-5 or scale), mean age + SD, Country; Brain imaging table shows participants (N, mean age+SD), diagNostic criteria, brain imaging method, results	Participants, scales for PG, scales for depression/anx, publication bias, subgroup analyses (e.g, malefemale) but No control variables, study type	sample characteristics, PG scale, survey, prevalence, comments	Sample size, age, country, scale for PG, scales for dep/anx, risk of bias	Scales for PG, total N for all studies per scale, cutoff for scales (revised to include "convergent validity" for depr/anx with arrow)	unclear b/c No summary of findings-some were described here and there but not for all	scales for PG, participants/samples, scales for depression/anxiety
Did the authors describe assessment of confounding in the text, table or table notes? (For example, did the control for age, gender, or time playing video games in analyses or compare univariate to multivariate analyses?)	No	They used only multivariate analyses in both genders to determine whether an association existed in the overall study. They reported this in table and text	No	Yes -table and text	No	No	No
List ALL of the stated associations (or lack of associations) between PG/IGD and DEPRESSION in the systematic review (e.g., People with PG compared to those without PG, PG vs. at-risk, continuous PG and continuous depression, earlier PG predicting later depression.Extract results verbatim from RESULTS section. Example 1. "A regression analysis showed that depression was associated with problemati…	"A problematic internet game use group showed more severe depression, conduct disorder, emotional symptoms, hyperactivity, peer problems, and perceived stress, and a higher percentage of self-injurious behavior compared with a Normal internet use group [15]....King et al. [5] reported higher scores of depression, anxiety, and stress in adolescents with IGD."	Table 1: Full association with…[list]; Table 2 lists15 numerical effect sizes for depression associations. Text:The largest correlations were between IGD and anxiety and depression and ADHD…"; Eight articles examined groups of general population formed by children, adolescents and adults together, exploring the association between IGD and 1 depression and anxiety [31,32,39,45], depression [36,41]…	Cross sectional: 6 in both text and table, 1 in text only, 3 in table only (incl Stritt suic), all associations, No null assoc. Longit: 1 in table and text, 1 in table only, all assoc (Text: Mentzoni 2011, Kiraly 2014, Brunborg 2015, Mannikko 2015, Strittmatter 2015, Desai 2010, King 2013 Clinical Features. Table: Muller 2015, Kim 2016). Longitudinal: 2 in text and table (Gentile)	a total of 8 studies (i.e. Brunborg et al., 2014; Desai et al., 2010; Király et al., 2014; Li et al., 2011; Papay et al., 2013; Peng and Liu, 2010; Strittmatter et al., 2015; Van Rooij et al., 2011) found PGB to be positively associated with depression alone, while 11 studies (i.e. Andreassen et al., 2016; Bouna-Pyrrou et al., 2015; Kim et al., 2016b; Lehenbauer-Baum et al., 2015; Lemos et al., 2…	8 associations between PG scale and depression as indicated by an arrow in a table; No indication if this is continuous or categorical (e.g., if groups are compared). No null associations.	agreed "associated with symptoms of generalized anxiety disorder, panic disorder, depression, social phobia" … "lower psychosocial well-being and lonelines" … "increased thoughts of committing suicide"	outomes of gaming included depression (Dongdong et al., 2011; Gentile et al., 2011; van Rooij et al., 2011), anxiety, and social phobias (Gentile et al., 2011; van Rooij et al., 2011), as ..."Pathological gaming explained as a function of actual-ideal self-discrepancy, depression, and escapism" "Game addiction correlated with use, loneliness, life satisfaction, social competence, and aggression"
List ALL of the stated associations (or lack of associations) between PG/IGD and ANXIETY in the systematic review (e.g., People with PG compared to those without PG, PG vs. at-risk, continuous PG and continuous depression, earlier PG predicting later depression.Extract results verbatim from RESULTS section. Example 1. "A regression analysis showed that anxiety was associated with problematic gami…	"King et al. [5] reported higher scores of depression, anxiety, and stress in adolescents with IGD."	Table 1: Full association with…[list]; Table 2 lists 10 associations with anxiety and 3 for social phobia/anxiety. Text: "The largest correlations were identified Int. J. Environ. Res. Public Health 2018, 15, 668 11 of 20 between IGD and anxiety and depression and ADHD…” Eight articles examined groups of general population formed by children, adolescents and adults together, exploring the associa…	Cross sectional: 2 in table and text, 1 in text only, 1 in table only, all associations, No null associations Text: Rehbein 2010, Mentzoni 2011, King 2013 Clinical Features. Table: Mannikko). Longitudinal: 1 in text and table (Gentile), 1 in table only Brunborg 2014	while 11 studies (i.e. Andreassen et al., 2016; Bouna-Pyrrou et al., 2015; Kim et al., 2016b; Lehenbauer-Baum et al., 2015; Lemos et al., 2016; Mentzoni et al., 2011; Müller et al., 2015; Son et al., 2013; Starcevic et al., 2011; Van Rooij et al., 2012; Vukosavljevic-Gvozden et al., 2016) found PGB to be associated with both depression and anxiety....and "social phobia (Lehenbaum).... More spe- c…	4 associations between PG scale and anxiety as indicated by an arrow as above	Internet gaming addiction was found to be associated with symptoms of generalized anxiety disorder, panic disorder, depression, social phobia (Allison et al. 2006)...state and trait anxiety (Mehroof and Griffiths 2010)...school phobia (Batthyány et al. 2009)	Outcomes of pathological gaming...depression (Dongdong et al., 2011; Gentile et al., 2011; van Rooij et al., 2011), anxiety, and social phobias (Gentile et al., 2011; van Rooij et al., 2011)...positively correlated with anxiety and loneliness (Kim & Kim, 2010)….related psychopathological problems and comorbidities comprised concentration deficits, psychosomatic challenge, school phobia (Batthyány…
Did the authors include the Gentile 2011 study?	No	Yes	Yes	No	Yes	No	Yes
If the authors included the Gentile 2011 study, how did they report associations between PG and DEPRESSION from that study? List all associations reported in table and text. (E.g., the authors put an up arrow and depression in the table; the text says "Depression was associated with PG/IGD (Gentile 2011...)	n/a	Table: Full association; Text (1) In the case of the longitudinal studies, Gentile et al. [43 ] reported elevated depressive symptoms after the pathological video-gaming problems started and these symptoms persisted and increased only if the pathological abuse persisted (2) "On the one hand, the results of the longitudinal study performed by Gentile et al. [43 ] showed that the adolescents who be…	"Gentile60 reported that children who began with more pathological gaming symptoms at baseline demonstrated higher levels of depression, anxiety, and social phobia, and lower school grades 2 years later"	n/a	↑Depression, Table 3. Included as 1 out of 7 total studies assessing psychometrics	n/a	depression (Dongdong et al., 2011; Gentile et al., 2011; ...Outcomes of pathological gaming: depression
If the authors included the Gentile 2011 study, how did they report associations between PG and ANXIETY from that study? List all associations reported in table and text. (E.g., the authors put an up arrow and depression in the table; the text says "Anxiety was associated with PG/IGD (Gentile 2011...)	n/a	Table: Full association with anx and soc phob, Text (1) The studies finding full assocition were: a longitudinal study identifying a large effect size (2) Furthermore, the longitudinal study, similar to the results found regarding anxiety and depression, found that social phobia symptoms worsen after a youth becomes a pathological gamer, and improve if an individual stops this activity (3) "On th…	"Gentile60 reported that children who began with more pathological gaming symptoms at baseline demonstrated higher levels of depression, anxiety, and social phobia, and lower school grades 2 years later"	n/a	↑Anxiety, ↑Social Phobia, Table 3. Included as 1 out of 7 total studies assessing psychometrics	n/a	, anxiety, and social phobias (Gentile et al., 2011; van Rooij et al., 2011)...Outcomes of pathological gaming: depression, anxiety, social phobias
Did the authors include the Rehbein 2010 study?	No	No	Yes	Yes	Yes	Yes	Yes
If the authors included the Rehbein 2010 study, how did they report associations between PG and DEPRESSION from that study? List all associations reported in table and text. (E.g., the authors put an up arrow and depression in the table; the text says "Depression was associated with PG/IGD (Rehbein 2011...)	n/a	n/a	They did not report depression results but Rehbein 2010 was citation 35: "Comorbid psychiatric problems were reported to be associated with IGD in many studies. These disorders included attention deficit and/or hyperactivity disorder,51,56,59,60 depression,40,45,48,51,56,61,72 anxiety,35,40,72". Table 2: "School-related anxieties""	suicidal thoughts with an up arrow in supplemental SOF table	↑Suicide risk	increased thoughts of committing suicide (Rehbein et al. 2010).	"increased suicidal ideations (Rehbein et al., 2010)" in text only
If the authors included the Rehbein 2010 study, how did they report associations between PG and ANXIETY from that study? List all associations reported in table and text. (E.g., the authors put an up arrow and depression in the table; the text says "Anxiety was associated with PG/IGD (Rehbein 2011...)	n/a	n/a	included it for anxiety under Cross-sectional associations -Personality, psychiatric comorbidity, and physical health conditions in text (but not table) as above	n/a	not reported	n/a	they didn't
How did the authors combine results? --Qualitatively/narrative only or quantitatively?	Qualitatively	both but not in a standard way - so can't really check	Qualitatively	Both	Qualitatively	Qualitatively	Qualitatively
If authors combined results quantitatively, how did they combine results? Did they report statistical heterogeneity? (e.g., Chi-squared or Q statistics)]	n/a	They counted the number of "full associations" for each of 4 psychopathologies and grouped them by effect size	n/a	Meta-analysis, reported I2 and Q2	n/a	n/a	n/a
If authors combined results quantitatively, given population/statistical/measurement heterogeneity, was it reasonable to combine results in meta-analysis?	n/a	n/a	n/a	No: "Pooling results from diverse, Non-randomized study types is not recommended" p. 45, CRD guidance 2008	n/a	n/a	n/a
Were the methods used to combine results appropriate? E.g., did the authors use random effects models if there was significant heterogeneity between studies?	Yes (narrative)	Unclear	Yes (narrative)	No (meta-analysis despite high heterogeneity)	Yes (narrative)	Yes (narrative)	Yes (narrative)
Did the authors report doing a sensitivity analysis? (For example, did they do a separate analysis of studies assessed as having low risk of bias?)	n/a	No	No	No	No	No	No
Did the authors report doing a subgroup analysis? (For example, did they compare results between males and females?) If so, what were the results?	n/a	Yes. They also looked at results by age and sex	No	Yes, by age	No	No	No
Did the authors report doing a meta-regression? (i.e., did they investigate differences in meta-analysis results based on study characteristics such as sample size?) IF so, what were the results?	n/a	No	No	No	No	No	No
Did the authors report a measure of statistical uncertainty if they did a quantitative synthesis/meta-analysis? (e.g., 95% confidence interval)	n/a	Yes, they reported CI's for the ds they calculated	n/a	Yes	No	n/a	No
Did the authors report the limitations of their review? If so, at which levels did they report limitations? Study, outcome, review	Listed some limitations of studies in the review	Yes, at all levels	No limitations reported	Yes - Study, outcome, review	Individual study level (e.g., the studies did not use representative samples), Exposure/Outcome level (e.g., depression was not measured consistently or PG and IA measures were conflated), Systematic review level (e.g., our review searched only two databases), Focus was on scope and limitations of PG measures, yet they also included studies that measured IA, with justification in text	Yes-all levels	empirical study level, outcome (measurement)
Did the authors mention whether they combined scales used to assess IGD/PG and scales used to assess IA as a limitation, if they did this? (Refer back to response given above.)	No	They acKnowledged some scales measured IA but combined them in the narrative reporting of results anyway.. But then separated the results again in the conclusion. They did talk about "inconsistencies" in definitions and evaluations	No	No, just talked about variability	Yes	No	No
In your judgement, do you think the conclusions related to the main research question of the systematic review are supported by the data? (Some examples: (1) if only a few of the included studies measured PG/IGD using a scale specific to PG/IGD but the authors made conclusions about PG/IGD specifically (2) If the associations with depression/anxiety were not linked to the PG/IGD scales but to IA …	No,but the conclusions are not very strong. There is not much causal langauge with regards to the psychosocial reporting	No	No	No	No	No	No
Did the systematic review show low quality as evidenced by any of the following: Did not define eligibility criteria, Did not conduct a comprehensive search, Authors did not specify how outcomes would be selected from included studies, Did not assess the risk of bias of included studies, Used inappropriate quantitative methods to combine findings of included studies, Conclusions were not supporte…	Yes-outcomes were not specified, risk of bias was not assessed	Authors did not specify how outcomes would be selected from included studies. Conclusions were not supported by evidence from the review [b/c didn't limit to IGD]	Yes	Yes - didn't specify how outcomes would be included	Yes	Yes	Yes
Overall, in your judgment, do you think the systematic review is reliable, given answers to the above or any other reasons?	No	No	No	No	No	No	No
Were there financial conflicts/other interests?	None declared; Grant funding reported	None declared; Grant funding reported	None declared; hospital/addiction center funded research	None declared; authors report receiving no funding	None declared; Grant funding reported	No statement of conflict of interest or funding support	No statement of conflict of interest or funding support
REVIEW ELIGIBILITY CRITERIA (ADDED AFTER PEER REVIEW)
Start date	"All publication years"	2011	"All publication years until May 2016"	2005	2000	2000	2000
End date	2018 (year of publication date-1)	Dec. 2017	May of 2016	June of 2016	2012	2010 (year of online publication -1)	2011-10-03
Language	eng	eng/span	eng	en	eng/dutch	unclear	eng/german
Full text retrievable	Yes	Yes	unclear	unclear	Yes	unclear	Yes
Measurement requirements	unclear	standardized questionnaires/criteria or "other proposed criteria based on international disease classifications"	"validated instrument" used to measure IGD	unclear	"psychometric instrument"	unclear	"an assessment of online gaming addiction in some form,"
Study design requirements	excluded case reports, must include "investigation of biopsychosocial characteristics in miNors with IGD"	empirically collected data, psychiatric comorbidity assessed by standardized questionnaires, No anecdotal or case report	cross-sectional or longitudinal (6+ months)	cross-sectional, longitudinal; excluded neuro, experiments, case reports	small sample sizes included, excluded "composite measure of PG", studies where the instrument was not named, case notes/anecdotes	"contain empirical data" "analysis related to Internet gaming addiction" (could include offline)	unclear
Peer-reviewed only?	unclear	Yes	Yes	Yes	No	unclear	Yes
AMSTAR CRITERIA
1.Did the research questions and inclusion criteria for the review include the components of PICO?	No	No	No	Yes	n/a; "The purpose of this study was to conduct an exhaustive review of the standards in assessment of all published quantitative research on pathological gaming."	No	Yes
…..P
…..I (or exposure, IGD)
…..C (n/a)
…..O
…..Timeframe (optional)
2.Did the report of the review contain an explicit statement that the review methods were established prior to the conduct of the review and did the report justify any significant deviations from the protocol?	No	No	No	No	No	No	No
For Partial Yes: The authors state that they had a written protocol or guide that included ALL the following:
…..review question(s)
….. A search strategy
…..inclusion/exclusion criteria
…..a risk of bias assessment
For Yes: As for partial yes, plus the protocol should be registered and should also have specified:
….a meta-analysis/synthesis plan, if appropriate, and
…..a plan for investigating causes of heterogeneity
…..justification for any deviations from the protocol
3. Did the review authors explain their selection of the study designs for inclusion in the review?	No	No	No	No	n/a , "The purpose of this study was to conduct an exhaustive review of the standards in assessment of all published quantitative research on pathological gaming."	No	No
For Yes, the review should satisfy ONE of the following: - Explanation for including only RCTs - OR Explanation for including only NRSI - OR Explanation for including both RCTs and NRSI
4. Did the review authors use a comprehensive literature search strategy?	No	No	No	No	Partial Yes	No	Yes
For Partial Yes (all the following):  searched at least 2 databases (relevant to research question)  provided key word and/or search strategy  justified publication restrictions (eg, language)
For Yes, should also have (all the following):  searched the reference lists/bibliographies of included studies  searched trial/study registries  included/consulted content experts in the field  where relevant, searched for grey literature  conducted search within 24 months of completion of the review
5. Did the review authors perform study selection in duplicate?	No	Yes	No	Yes	Yes	No	No
For Yes, either ONE of the following:  at least two reviewers independently agreed on selection of eligible studies and achieved consensus on which studies to include  OR two reviewers selected a sample of eligible studies and achieved good agreement (at least 80 per cent), with the remainder selected by one reviewer
6. Did the review authors perform data extraction in duplicate?	No	No	No	Yes	Yes	No	Unclear
For Yes, either ONE of the following:  at least two reviewers achieved consensus on which data to extract from included studies  OR two reviewers extracted data from a sample of eligible studies and achieved good agreement (at least 80 per cent), with the remainder extracted by one reviewer
7. Did the review authors provide a list of excluded studies and justify the exclusions?	No	No	No	No	No	No	No
For Partial Yes:  provided a list of all potentially relevant studies that were read in full text form but excluded from the review
For Yes, must also have:  Justified the exclusion from the review of each potentially relevant study
8. Did the review authors describe the included studies in adequate detail?	No	No	No	Partial Yes	No	No	Partial Yes
For Partial Yes (ALL the following):  described populations  described interventions  described comparators  described outcomes  described research designs
For Yes, should also have ALL the following:  described population in detail  described intervention and comparator in detail (including doses where relevant)  described study’s setting  timeframe for follow-up
9. Did the review authors use a satisfactory technique for assessing the risk of bias (RoB) in individual studies that were included in the review?	No	No	No	Partial Yes	No	No	No
RCTs For Partial Yes, must have assessed RoB from  unconcealed allocation, and  lack of blinding of patients and assessors when assessing outcomes (unnecessary for objective outcomes such as all cause mortality)
RCTs: For Yes, must also have assessed RoB from:  allocation sequence that was not truly random, and  selection of the reported result from among multiple measurements or analyses of a specified outcome
NRSI For Partial Yes, must have assessed RoB:  from confounding, and  from selection bias
NRSI For Yes, must also have assessed RoB:  methods used to ascertain exposures and outcomes, and  selection of the reported result from among multiple measurements or analyses of a specified outcome
10. Did the review authors report on the sources of funding for the studies included in the review?	No	No	No	No	No	No	No
For Yes  Must have reported on the sources of funding for individual studies included in the review. Note: Reporting that the reviewers looked for this information but it was not reported by study authors also qualifies
11. If meta-analysis was performed did the review authors use appropriate methods for statistical combination of results?	No meta-analysis conducted	No meta-analysis conducted	No meta-analysis conducted	No	No meta-analysis conducted	No meta-analysis conducted	No meta-analysis conducted
RCTs For Yes:  The authors justified combining the data in a meta-analysis  AND they used an appropriate weighted technique to combine study results and adjusted for heterogeneity if present  AND investigated the causes of any heterogeneity
For NRSI For Yes:  The authors justified combining the data in a meta-analysis  AND they used an appropriate weighted technique to combine study results, adjusting for heterogeneity if present  AND they statistically combined effect estimates from NRSI that were adjusted for confounding, rather than combining raw data, or justified combining raw data when adjusted effect estimates were not ava…
12. If meta-analysis was performed, did the review authors assess the potential impact of RoB in individual studies on the results of the meta-analysis or other evidence synthesis?	No meta-analysis conducted	No meta-analysis conducted	No meta-analysis conducted	No	No meta-analysis conducted	No meta-analysis conducted	No meta-analysis conducted
For Yes:  included only low risk of bias RCTs  OR, if the pooled estimate was based on RCTs and/or NRSI at variable RoB, the authors performed analyses to investigate possible impact of RoB on summary estimates of effect
13. Did the review authors account for RoB in individual studies when interpreting/discussing the results of the review?	No	No	No	No	No	No	No
For Yes:  included only low risk of bias RCTs  OR, if RCTs with moderate or high RoB, or NRSI were included the review provided a discussion of the likely impact of RoB on the results
14. Did the review authors provide a satisfactory explanation for, and discussion of, any heterogeneity observed in the results of the review?	No	No	No	Yes	Yes	No	No
For Yes:  There was no significant heterogeneity in the results  OR if heterogeneity was present the authors performed an investigation of sources of any heterogeneity in the results and discussed the impact of this on the results of the review
15. If they performed quantitative synthesis did the review authors carry out an adequate investigation of publication bias (small study bias) and discuss its likely impact on the results of the review?	No meta-analysis conducted	Yes	No meta-analysis conducted	Yes	No meta-analysis conducted	No meta-analysis conducted	No meta-analysis conducted
For Yes:  performed graphical or statistical tests for publication bias and discussed the likelihood and magnitude of impact of publication bias
16. Did the review authors report any potential sources of conflict of interest, including any funding they received for conducting the review?	Yes	Yes	Yes	Yes	Yes	No	No
For Yes:  The authors reported no competing interests OR  The authors described their funding sources and how they managed potential conflicts of interest

## Sheet: PG scales
Sugaya						Gonzalez					Mihara						Mannikko						King						Kuss (Internet addiction)							Kuss (Online gaming)

## Sheet: Abbreviations
Well-being measures							Problematic gaming (or problematic Internet use) measures
BDI	Beck Depression Inventory						AICA-S	Assessment of Pathological Computer Gaming
DASS	Depression Anxiety Stress Scale						CIAS	Chen Internet Addiction Scale
DSSS	Depression and Somatic Symptoms Scale						CIUS	Compulsive Internet Use Scale
GAS	Game Addiction Scale						CSVK	Computerspielverhalten bei Kindern und Jugendlichen
HADS	Hospital Anxiety and Depression Scale						DAS	DSM-IV-TR Substance Dependence Adapted Scale
PG	Problematic gaming						DCIA-C	diagnostic criteria of Internet addiction for college students
RADS	Reynolds Adolescent Depression Scale						DSM IV-TR	Diagnostic and Statistical Manual V.4, Text revision
RCADS	Revised Children's Anxiety and Depression Scale						GAIT	Gaming Addiction Identification Test
SAS	Self-rating Anxiety Scale						GAS	Game Addiction Scale
SCL	Symptoms Checklist						GPIUS	Generalized Problematic Internet Use Scale
SDS	Self-rating Depression Scale						IAS	Internet Addiction Scale
STAI	State Trait Anxiety Inventory						IGD	Internet gaming disorder
VAT	Videogame Addiction Test						ISS-20	Problematic Internet Use Scale
YSR	Youth Self-report						KIAT	Korean Internet Addiction Test
SDS	Self-rating depression scale						OAGI	Online Game Addiction Index
							OAST	Online Games Addiction Scale for Adolescents in Taiwan
							POG	Problematic Online Gaming
							PTU	Pathological technology use
							PUVG	Problematic Use of Video Games
							PVG	Problematic Video Gaming
							PVGT	Problematic Video Gaming Test
							PVP	Problematic Videogame Play
							VDT	Videogame Dependency Test
							VGU	Video Game Use
							YDQ	Young Diagnostic Questionnaire
							YIAS	Young Internet Addiction Scale
							YIAT	Young Internet Addiction Test
